# Supplementary material for: Can digitally enabling community health and nutrition workers improve services delivery to pregnant women and mothers of infants? Quasi-experimental evidence from a national-scale nutrition programme in India
Source: PubMed Central journal article supplement (PMC9296874; doi:10.1136/bmjgh-2021-007298), 2022-07-14
Supplement: bmjgh-2021-007298supp001.pdf [file bmjgh-2021-007298supp001.pdf]

Table S1. Construction of Primary and Secondary Outcome Indicators and other Covariates

| Name                                                                                                 | Description                                                                             | Type   | Notes on Construction and Measurement                                                                                                                                                                                                                                                                                                                                                                                                                                                    |
|------------------------------------------------------------------------------------------------------|-----------------------------------------------------------------------------------------|--------|------------------------------------------------------------------------------------------------------------------------------------------------------------------------------------------------------------------------------------------------------------------------------------------------------------------------------------------------------------------------------------------------------------------------------------------------------------------------------------------|
| <b>Outcomes</b>                                                                                      |                                                                                         |        |                                                                                                                                                                                                                                                                                                                                                                                                                                                                                          |
| <b>Primary Outcomes at Beneficiary Level</b>                                                         |                                                                                         |        |                                                                                                                                                                                                                                                                                                                                                                                                                                                                                          |
| adeq_num_hv_3m                                                                                       | Received adequate number of home visits in last three months (mother)                   | Binary | ICDS provides detailed guidelines specifying the number of home visits a beneficiary should receive at different life stages. For example, a mother must receive at least one home visit per month when the child is between 6-8 months of age. The indicator is coded 1 if the mother received adequate number of visits in the last three months, and 0 otherwise. We use an additional assumption that every mother should receive at least one home visit in a given 3-month period. |
| recd_50pct_messages                                                                                  | Received at least half the life-state appropriate counselling messages (mother)         | Binary | ICDS provides information about the various life-stage appropriate counselling messages that should be provided to mothers at different life stages. The indicator is coded 1 if the mother received at least half the appropriate counseling messages in the last three months, and 0 otherwise.                                                                                                                                                                                        |
| adeq_num_hv_3m_PW                                                                                    | Received adequate number of home visits in last three months (pregnant woman)           | Binary | ICDS provides detailed guidelines specifying the number of home visits a beneficiary should receive at different life stages. For example, a pregnant woman must receive at least two home visits in the last trimester, preferably in the 7th and 9th months. The indicator is coded 1 if the pregnant woman received one or more home visits in her last trimester, and 0 otherwise.                                                                                                   |
| recd_50pct_mess_PW                                                                                   | Received at least half the life-state appropriate counselling messages (pregnant woman) | Binary | ICDS provides information about the various life-stage appropriate counselling messages that should be provided to pregnant women in the last trimester. The indicator is coded 1 if the pregnant women received at least half the appropriate counseling messages in the last three months, and 0 otherwise.                                                                                                                                                                            |
| <b>Secondary Outcomes at Beneficiary Level (Other services by the Community Health Worker [CHW])</b> |                                                                                         |        |                                                                                                                                                                                                                                                                                                                                                                                                                                                                                          |
| weighed3months                                                                                       | Child was weighed by CHW at least once in last three months                             | Binary | Coded 1 if the mother reported that the CHW weighed her child at least once in the last three months, and 0 otherwise.                                                                                                                                                                                                                                                                                                                                                                   |
| discuss_childweight                                                                                  | CHW discussed child's weight with mother in last three months                           | Binary | Coded 1 if the mother reported that the CHW discussed her child's weight or nutritional status in the last three months, and 0 otherwise.                                                                                                                                                                                                                                                                                                                                                |
| recd_THR_reg                                                                                         | Receives THR for herself/child one or more times a month from AWC                       | Binary | Coded 1 if the mother reported that she receives THR one or more times a month from the AWC, and 0 otherwise.                                                                                                                                                                                                                                                                                                                                                                            |
| counsel_THR                                                                                          | CHW counselled mother on THR consumption for mother/child                               | Binary | Coded 1 if the mother reported that she was counseled by the CHW on THR consumption for herself or for her child, and 0 otherwise.                                                                                                                                                                                                                                                                                                                                                       |
| consumed_THR                                                                                         | Reported consuming or feeding child at least some of the THR received                   | Binary | Coded 1 if the mother reported that she/her child consumed at least some THR, and 0 otherwise.                                                                                                                                                                                                                                                                                                                                                                                           |
| <b>Secondary Outcomes at Beneficiary Level (Infant and Young Child Feeding)</b>                      |                                                                                         |        |                                                                                                                                                                                                                                                                                                                                                                                                                                                                                          |
| advice_exclBF                                                                                        | CHW counselled mother on exclusive breastfeeding of child <6m                           | Binary | Coded 1 if the mother reported that she was counseled by the CHW on exclusive breastfeeding for children under 6m, and 0 otherwise.                                                                                                                                                                                                                                                                                                                                                      |
| only_bf_0_5m                                                                                         | Child (0-5m) was fed only breastmilk in last 24 hours                                   | Binary | Coded 1 if the mother reported that her child aged 0-5m was only fed breastmilk in the last 24 hours, and 0 otherwise.                                                                                                                                                                                                                                                                                                                                                                   |
| advice_CFinitiation                                                                                  | CHW counselled mother on the right time to start complementary feeding                  | Binary | Coded 1 if the mother reported that she was counseled by the CHW on the right time to start complementary feeding, and 0 otherwise.                                                                                                                                                                                                                                                                                                                                                      |
| iycf_introfood                                                                                       | Child (6-8m) was fed some semi-solid or solid food in last 24 hours                     | Binary | Coded 1 if the mother reported that her child aged 6-8m was fed any semi-solid or solid food in the last 24 hours, and 0 otherwise.                                                                                                                                                                                                                                                                                                                                                      |
| advice_adequateIYCF                                                                                  | CHW counselled mother on adequate diet (frequency, diet diversity) for child (6-12m)    | Binary | Coded 1 if the mother reported that she was counseled by the CHW on adequate diet (number of meals and diet diversity) for her child aged 6-12m, and 0 otherwise.                                                                                                                                                                                                                                                                                                                        |
| adeq_diet                                                                                            | Child (6-12m) received adequate diet (number of meals, diet diversity) in last 24 hours | Binary | Coded 1 if the child was fed adequate number of meals with minimum diet diversity for their age as per UN/WHO guidelines, and 0 otherwise.                                                                                                                                                                                                                                                                                                                                               |

| Name                                                              | Description                                                      | Type       | Notes on Construction and Measurement                                                                                                           |
|-------------------------------------------------------------------|------------------------------------------------------------------|------------|-------------------------------------------------------------------------------------------------------------------------------------------------|
| <b>Covariates and Control Variables</b>                           |                                                                  |            |                                                                                                                                                 |
| <b>Individual and Household Characteristics</b>                   |                                                                  |            |                                                                                                                                                 |
| mo_age                                                            | Beneficiary's age in completed years                             | Continuous |                                                                                                                                                 |
| agemth                                                            | Child's age in completed months                                  | Continuous |                                                                                                                                                 |
| child_sex                                                         | Sex of child                                                     | Binary     | 0=Male, 1=Female                                                                                                                                |
| mo_edu8                                                           | Beneficiary's education >= 8 years                               | Binary     | Coded 1 if mother's education level is >= 8 years (elementary school or higher), and 0 otherwise. Missing values recoded as 0 (0.4%)            |
| mo_work                                                           | Beneficiary is engaged in work to earn income                    | Binary     | Coded 1 if mother is engaged in job/work to earn income, and 0 otherwise.                                                                       |
| SC_ST                                                             | Beneficiary belongs to Scheduled Caste/ Scheduled Tribe category | Binary     | Coded 1 if mother belongs to SC/ST category, and 0 otherwise. Coded 0 if respondent refused to specify caste (0.09%)                            |
| score                                                             | PCA Index score for household wealth                             | Continuous | PCA index score calculated based on ownership of 28 assets, including television, mobile phone, bed/cot, refrigerator, bicycle, AC/cooler, etc. |
| sleeproom                                                         | Number of rooms used for sleeping in the household               | Continuous | Number of rooms in the house that are used for sleeping by household members                                                                    |
| own_land                                                          | Household owns any agricultural land                             | Binary     | Coded 1 if household owns any agricultural land, and 0 otherwise. 'Don't know' recoded as 0 (2%)                                                |
| im_fuels                                                          | Household uses improved fuel for cooking                         | Binary     | Coded 1 if household uses improved fuel for cooking (electricity, LPG, natural gas, or biogas), and 0 otherwise.                                |
| hh_toilet                                                         | Household has a functional toilet                                | Binary     | Coded 1 if household has a functional toilet, and 0 otherwise.                                                                                  |
| <b>CHW and Anganwadi Center (AWC) Characteristics<sup>#</sup></b> |                                                                  |            |                                                                                                                                                 |
| chw_age                                                           | CHW's age in completed years                                     | Continuous |                                                                                                                                                 |
| chw_edu12                                                         | CHW's education >= 12 years                                      | Binary     | Coded 1 if CHW's education level is >= 12 years (high-school or higher), and 0 otherwise. Missing values recoded as 0 (0.3%)                    |
| chw_SC_ST                                                         | CHW belongs to Scheduled Caste/ Scheduled Tribe category         | Binary     | Coded 1 if CHW belongs to SC/ST category, and 0 otherwise. Coded 0 if CHW refused to specify caste (0.52%)                                      |
| chw_experience                                                    | Number of years of experience as an CHW                          | Continuous |                                                                                                                                                 |
| chw_otherwork                                                     | CHW is engaged in other work to earn income                      | Binary     | Coded 1 if CHW is engaged in any work/occupation to earn income (other than being CHW), and 0 otherwise.                                        |
| awc_electricity                                                   | AWC has electricity                                              | Binary     | Coded 1 if AWC had electricity supply, and 0 otherwise.                                                                                         |
| blavg_awc_population                                              | Total population covered in the catchment areas of the AWC       | Continuous | Total population in AWC's catchment area at the baseline                                                                                        |
| blavg_awc_water_toilet                                            | AWC had drinking water and toilet on premises at baseline        | Binary     | Coded 1 if baseline AWC has drinking water and toilet on premises, and 0 otherwise                                                              |
| blavg_awc_scale_chart                                             | AWC had child weighing scale and growth chart at baseline        | Binary     | Coded 1 if baseline AWC has child weighing scale and growth chart on premises, and 0 otherwise                                                  |

<sup>#</sup> In cases where CHW-level data was missing for a few covariates used in the estimation model (1-3% of the AWWs), the missing values were imputed using block-level averages of these covariates. We tested whether such imputation led to biased estimates by including a dummy variable in the estimation models to flag observations which use imputed data and found that this dummy variable was statistically insignificant across all the outcomes.

Table S2. Pre-Intervention Balance in Covariates using Baseline Data, 2017.

| Variables                                                    | MP   |            |              |                                           | Bihar |            |              |                                            |
|--------------------------------------------------------------|------|------------|--------------|-------------------------------------------|-------|------------|--------------|--------------------------------------------|
|                                                              | N    | Comparison | Intervention | Difference                                | N     | Comparison | Intervention | Difference                                 |
| <b>Individual and Household Characteristics</b>              |      |            |              |                                           |       |            |              |                                            |
| Beneficiary's age (in completed years)                       | 2229 | 23.99      | 24.01        | 0.02<br>[-0.3 - 0.33];<br>p-value 0.922   | 2764  | 24.22      | 24.70        | 0.48<br>[0.11 - 0.85];<br>p-value 0.01     |
| Beneficiary's education (in years)                           | 2228 | 4.51       | 4.97         | 0.43<br>[0.01 - 0.86];<br>p-value 0.046   | 2764  | 3.89       | 3.29         | -0.6<br>[-1.08 - -0.13];<br>p-value 0.013  |
| Beneficiary completed at least 8 years of education          | 2229 | 36.60%     | 39.54%       | 0.03<br>[-0.02 - 0.07];<br>p-value 0.243  | 2764  | 29.50%     | 24.45%       | -0.05<br>[-0.09 - -0.01];<br>p-value 0.024 |
| Beneficiary works to earn income                             | 2229 | 44.71%     | 43.38%       | -0.01<br>[-0.05 - 0.03];<br>p-value 0.553 | 2764  | 10.07%     | 11.14%       | 0.01<br>[-0.02 - 0.04];<br>p-value 0.454   |
| Beneficiary was married before 18 years of age               | 1232 | 26.71%     | 32.52%       | 0.06<br>[0.01 - 0.11];<br>p-value 0.028   | 1277  | 44.53%     | 46.00%       | 0.01<br>[-0.04 - 0.07];<br>p-value 0.612   |
| Beneficiary owns an Aadhar card                              | 2229 | 93.92%     | 94.06%       | 0<br>[-0.02 - 0.02];<br>p-value 0.901     | 2764  | 96.98%     | 95.78%       | -0.01<br>[-0.03 - 0];<br>p-value 0.09      |
| Beneficiary owns a bank account                              | 2229 | 78.31%     | 80.27%       | 0.02<br>[-0.02 - 0.06];<br>p-value 0.318  | 2764  | 76.12%     | 79.55%       | 0.03<br>[0 - 0.07];<br>p-value 0.068       |
| Beneficiary ever used any family planning methods            | 1235 | 42.93%     | 43.55%       | 0.01<br>[-0.05 - 0.07];<br>p-value 0.834  | 1278  | 36.56%     | 34.17%       | -0.02<br>[-0.09 - 0.05];<br>p-value 0.55   |
| Total number of pregnancies in beneficiary's lifetime        | 2229 | 2.42       | 2.41         | -0.01<br>[-0.13 - 0.11];<br>p-value 0.871 | 2764  | 2.67       | 2.83         | 0.16<br>[0.03 - 0.28];<br>p-value 0.013    |
| Mother had a normal delivery                                 | 1235 | 92.03%     | 92.26%       | 0<br>[-0.03 - 0.03];<br>p-value 0.869     | 1278  | 91.09%     | 93.26%       | 0.02<br>[-0.01 - 0.05];<br>p-value 0.16    |
| Beneficiary belongs to scheduled caste/tribe household       | 2229 | 55.73%     | 49.86%       | -0.06<br>[-0.12 - 0];<br>p-value 0.041    | 2764  | 34.89%     | 38.43%       | 0.04<br>[-0.03 - 0.1];<br>p-value 0.253    |
| Beneficiary belongs to Below-Poverty-Line household          | 2229 | 63.40%     | 65.48%       | 0.02<br>[-0.02 - 0.07];<br>p-value 0.361  | 2764  | 57.91%     | 61.94%       | 0.04<br>[-0.01 - 0.09];<br>p-value 0.094   |
| Beneficiary lives in a pucca house                           | 2229 | 25.75%     | 28.86%       | 0.03<br>[-0.02 - 0.08];<br>p-value 0.195  | 2764  | 37.70%     | 37.55%       | 0<br>[-0.05 - 0.05];<br>p-value 0.977      |
| Number of rooms used for sleeping in beneficiary's household | 2229 | 1.81       | 1.86         | 0.05<br>[-0.04 - 0.14];<br>p-value 0.251  | 2764  | 1.87       | 1.81         | -0.06<br>[-0.13 - 0.02];<br>p-value 0.162  |

| Variables                                                                        | MP   |            |              |                                            | Bihar |            |              |                                            |
|----------------------------------------------------------------------------------|------|------------|--------------|--------------------------------------------|-------|------------|--------------|--------------------------------------------|
|                                                                                  | N    | Comparison | Intervention | Difference                                 | N     | Comparison | Intervention | Difference                                 |
| Beneficiary's household owns any agricultural land                               | 2229 | 76.37%     | 73.70%       | -0.03<br>[-0.07 - 0.02];<br>p-value 0.259  | 2764  | 46.83%     | 42.94%       | -0.04<br>[-0.09 - 0.01];<br>p-value 0.14   |
| Beneficiary's household uses improved fuel for cooking                           | 2229 | 10.05%     | 13.70%       | 0.04<br>[0.01 - 0.07];<br>p-value 0.012    | 2764  | 17.48%     | 14.85%       | -0.03<br>[-0.06 - 0.01];<br>p-value 0.14   |
| Beneficiary's household gets drinking water from improved source                 | 2229 | 13.14%     | 13.97%       | 0.01<br>[-0.03 - 0.04];<br>p-value 0.623   | 2764  | 60.07%     | 55.75%       | -0.04<br>[-0.1 - 0.01];<br>p-value 0.119   |
| Beneficiary's household has a functional toilet                                  | 2229 | 51.85%     | 44.75%       | -0.07<br>[-0.13 - -0.01];<br>p-value 0.028 | 2764  | 23.38%     | 39.23%       | 0.16<br>[0.1 - 0.21];<br>p-value 0         |
| Household Wealth Index based on Principle Component Analysis                     | 1235 | 0.48       | 0.44         | -0.05<br>[-0.34 - 0.24];<br>p-value 0.74   | 1278  | -0.31      | -0.58        | -0.27<br>[-0.52 - -0.02];<br>p-value 0.037 |
| <b>Health services to mothers</b>                                                |      |            |              |                                            |       |            |              |                                            |
| Beneficiary registered pregnancy with the Anganwadi Centres (AWC)                | 2229 | 72.13%     | 66.21%       | -0.06<br>[-0.12 - 0];<br>p-value 0.056     | 2764  | 78.42%     | 80.93%       | 0.02<br>[-0.02 - 0.07];<br>p-value 0.296   |
| Mother received at least 4 Antenatal check-ups from a health professional/worker | 1235 | 51.38%     | 49.35%       | -0.02<br>[-0.08 - 0.04];<br>p-value 0.512  | 1278  | 25.63%     | 19.91%       | -0.06<br>[-0.1 - -0.01];<br>p-value 0.02   |
| Mother had an institutional delivery                                             | 1235 | 81.63%     | 81.77%       | 0<br>[-0.04 - 0.04];<br>p-value 0.963      | 1278  | 72.50%     | 66.93%       | -0.06<br>[-0.11 - 0];<br>p-value 0.062     |
| <b>Community Health Worker (CHW) Characteristics</b>                             |      |            |              |                                            |       |            |              |                                            |
| CHW's age                                                                        | 417  | 39.33      | 40.65        | 1.31<br>[-0.44 - 3.06];<br>p-value 0.142   | 428   | 39.08      | 37.52        | -1.56<br>[-3.03 - -0.1];<br>p-value 0.04   |
| CHW's education (in years)                                                       | 417  | 10.11      | 10.85        | 0.74<br>[0.08 - 1.39];<br>p-value 0.027    | 428   | 11.51      | 11.82        | 0.3<br>[-0.09 - 0.69];<br>p-value 0.13     |
| CHW completed at least 12 years of education                                     | 417  | 41.35%     | 51.67%       | 0.1<br>[0.01 - 0.2];<br>p-value 0.036      | 428   | 53.52%     | 57.67%       | 0.04<br>[-0.06 - 0.14];<br>p-value 0.42    |
| CHW belongs to Scheduled caste/tribe household                                   | 417  | 52.88%     | 42.11%       | -0.11<br>[-0.19 - -0.03];<br>p-value 0.01  | 428   | 16.43%     | 21.40%       | 0.05<br>[-0.03 - 0.13];<br>p-value 0.19    |
| CHW owns a smartphone                                                            | 417  | 22.60%     | 94.26%       | 0.72<br>[0.65 - 0.79];<br>p-value 0        | 428   | 3.29%      | 93.02%       | 0.9<br>[0.86 - 0.94];<br>p-value 0         |
| Number of years of experience as an CHW                                          | 417  | 14.65      | 15.35        | 0.71<br>[-0.79 - 2.21];<br>p-value 0.352   | 428   | 13.89      | 11.27        | -2.62<br>[-3.89 - -1.35];<br>p-value 0     |

| Variables                                                                              | MP  |            |              |                                            | Bihar |            |              |                                           |
|----------------------------------------------------------------------------------------|-----|------------|--------------|--------------------------------------------|-------|------------|--------------|-------------------------------------------|
|                                                                                        | N   | Comparison | Intervention | Difference                                 | N     | Comparison | Intervention | Difference                                |
| CHW is engaged in other work to earn income                                            | 417 | 3.37%      | 11.96%       | 0.09<br>[0.04 - 0.14];<br>p-value 0.001    | 428   | 1.41%      | 5.58%        | 0.04<br>[0.01 - 0.07];<br>p-value 0.01    |
| Number of months in the last year for which the CHW did not receive salary             | 417 | 0.75       | 2.03         | 1.28<br>[0.68 - 1.88];<br>p-value 0        | 428   | 7.25       | 6.94         | -0.32<br>[-0.99 - 0.35];<br>p-value 0.34  |
| CHW is trained in 7 key topics under the systems strengthening programme               | 417 | 69.23%     | 53.11%       | -0.16<br>[-0.25 - -0.07];<br>p-value 0.001 | 428   | 38.97%     | 39.53%       | 0<br>[-0.08 - 0.09];<br>p-value 0.96      |
| AWC has pucca construction                                                             | 417 | 80.29%     | 84.21%       | 0.04<br>[-0.04 - 0.11];<br>p-value 0.302   | 428   | 54.93%     | 52.56%       | -0.02<br>[-0.11 - 0.07];<br>p-value 0.62  |
| AWC has drinking water on premises                                                     | 417 | 67.79%     | 57.89%       | -0.1<br>[-0.19 - -0.01];<br>p-value 0.037  | 428   | 44.13%     | 46.51%       | 0.02<br>[-0.07 - 0.12];<br>p-value 0.62   |
| AWC has toilet on premises                                                             | 417 | 38.94%     | 28.71%       | -0.1<br>[-0.19 - -0.02];<br>p-value 0.021  | 428   | 11.27%     | 18.14%       | 0.07<br>[0 - 0.14];<br>p-value 0.04       |
| AWC has drinking water and toilet on premises                                          | 417 | 27.88%     | 18.66%       | -0.09<br>[-0.17 - -0.01];<br>p-value 0.022 | 428   | 7.98%      | 14.88%       | 0.07<br>[0.01 - 0.13];<br>p-value 0.02    |
| AWC has electricity supply                                                             | 417 | 21.15%     | 15.79%       | -0.05<br>[-0.13 - 0.02];<br>p-value 0.151  | 428   | 16.43%     | 16.28%       | 0<br>[-0.07 - 0.07];<br>p-value 0.97      |
| AWC has functional child weighing scale                                                | 417 | 92.31%     | 83.73%       | -0.09<br>[-0.15 - -0.02];<br>p-value 0.01  | 428   | 44.60%     | 63.26%       | 0.18<br>[0.09 - 0.28];<br>p-value 0       |
| AWC has growth charts for children                                                     | 417 | 82.69%     | 74.64%       | -0.08<br>[-0.16 - -0.01];<br>p-value 0.036 | 428   | 41.78%     | 49.30%       | 0.07<br>[-0.02 - 0.17];<br>p-value 0.13   |
| AWC has child weighing scale and growth charts for children                            | 417 | 80.77%     | 68.90%       | -0.12<br>[-0.2 - -0.04];<br>p-value 0.004  | 428   | 29.58%     | 43.26%       | 0.13<br>[0.05 - 0.22];<br>p-value 0       |
| CHW reported facing problems with Take-Home-Ration supply from district administration | 417 | 11.06%     | 14.35%       | 0.03<br>[-0.03 - 0.09];<br>p-value 0.3     | 428   | 48.36%     | 41.40%       | -0.07<br>[-0.16 - 0.02];<br>p-value 0.11  |
| Total population in AWC catchment area                                                 | 411 | 728.17     | 856.40       | 124.61<br>[65.6 - 183.6];<br>p-value 0     | 427   | 1109.19    | 1116.86      | 7.86<br>[-48.97 - 64.68];<br>p-value 0.79 |
| Total population covered by AWC >= 800                                                 | 411 | 38.16%     | 50.00%       | 0.11<br>[0.02 - 0.21];<br>p-value 0.019    | 427   | 91.04%     | 94.42%       | 0.03<br>[-0.02 - 0.08];<br>p-value 0.19   |
| Number of pregnant women in AWC catchment area                                         | 411 | 7.35       | 7.69         | 0.32<br>[-0.84 - 1.47];<br>p-value 0.59    | 424   | 12.30      | 12.39        | 0.1<br>[-0.8 - 0.99];<br>p-value 0.83     |

| Variables                                                                                                             | MP   |            |              |                                            | Bihar |            |              |                                            |
|-----------------------------------------------------------------------------------------------------------------------|------|------------|--------------|--------------------------------------------|-------|------------|--------------|--------------------------------------------|
|                                                                                                                       | N    | Comparison | Intervention | Difference                                 | N     | Comparison | Intervention | Difference                                 |
| Number of lactating women in AWC catchment area                                                                       | 411  | 5.87       | 7.37         | 1.5<br>[0.68 - 2.32];<br>p-value 0         | 424   | 12.08      | 11.07        | -1<br>[-1.98 - -0.02];<br>p-value 0.04     |
| <b>Outcomes</b>                                                                                                       |      |            |              |                                            |       |            |              |                                            |
| % of mothers who received adequate number of home visits in last 3 months                                             | 1235 | 17.07%     | 14.52%       | -0.03<br>[-0.07 - 0.02];<br>p-value 0.249  | 1278  | 5.94%      | 8.62%        | 0.03<br>[0 - 0.06];<br>p-value 0.09        |
| % of mothers who received at least 50% of the correct counselling messages as per their life stage                    | 1235 | 8.13%      | 7.74%        | 0<br>[-0.04 - 0.03];<br>p-value 0.815      | 1278  | 1.25%      | 2.19%        | 0.01<br>[-0.01 - 0.02];<br>p-value 0.228   |
| % of pregnant women who received adequate number of home visits in last 3 months                                      | 994  | 38.73%     | 41.05%       | 0.02<br>[-0.05 - 0.1];<br>p-value 0.544    | 1486  | 23.47%     | 29.62%       | 0.06<br>[0 - 0.11];<br>p-value 0.036       |
| % of pregnant women who received at least 50% of the correct counselling messages as per their life stage             | 994  | 0.96%      | 1.68%        | 0.01<br>[-0.01 - 0.02];<br>p-value 0.421   | 1486  | 1.87%      | 1.77%        | 0<br>[-0.02 - 0.02];<br>p-value 0.898      |
| % of mothers who reported that their child was weighed by CHW at least once in last 3 months                          | 1235 | 50.57%     | 57.10%       | 0.07<br>[0 - 0.13];<br>p-value 0.05        | 1278  | 15.00%     | 23.98%       | 0.09<br>[0.03 - 0.14];<br>p-value 0.002    |
| % of mothers who reported that CHW discussed their child's weight or showed child's growth chart                      | 1235 | 34.96%     | 37.90%       | 0.03<br>[-0.03 - 0.09];<br>p-value 0.328   | 1278  | 9.84%      | 16.77%       | 0.07<br>[0.02 - 0.11];<br>p-value 0.004    |
| % of mothers who received THR at least once a month from CHW                                                          | 1235 | 73.33%     | 74.35%       | 0.01<br>[-0.04 - 0.06];<br>p-value 0.701   | 1278  | 22.81%     | 17.71%       | -0.05<br>[-0.1 - 0];<br>p-value 0.05       |
| % of mothers (6-12m child) who recall being counselled about mother's/child's THR consumption by CHW in last 3 months | 470  | 11.06%     | 6.15%        | -0.05<br>[-0.11 - 0];<br>p-value 0.069     | 454   | 0.43%      | 2.70%        | 0.02<br>[0 - 0.05];<br>p-value 0.061       |
| % of mothers who reported that they/their child consumed any THR                                                      | 1235 | 78.21%     | 80.16%       | 0.02<br>[-0.03 - 0.07];<br>p-value 0.411   | 1278  | 59.38%     | 42.79%       | -0.17<br>[-0.23 - -0.1];<br>p-value 0      |
| % of mothers (0-6m child) who recalled being counselled about exclusive breastfeeding by CHW                          | 765  | 17.74%     | 18.88%       | 0.01<br>[-0.05 - 0.07];<br>p-value 0.672   | 824   | 5.64%      | 9.86%        | 0.04<br>[0 - 0.08];<br>p-value 0.041       |
| % of children aged 0-6m who were only fed breastmilk during the previous 24 hours                                     | 765  | 46.02%     | 49.47%       | 0.03<br>[-0.04 - 0.1];<br>p-value 0.364    | 824   | 60.05%     | 51.44%       | -0.09<br>[-0.15 - -0.02];<br>p-value 0.012 |
| % of mothers (6-8m child) who recalled being counselled about the right time to start complementary feeding by CHW    | 265  | 15.08%     | 17.99%       | 0.02<br>[-0.07 - 0.11];<br>p-value 0.698   | 272   | 1.60%      | 9.52%        | 0.08<br>[0.03 - 0.14];<br>p-value 0.004    |
| % of children aged 6-8m who received solid, semi-solid, or soft foods during previous 24 hours                        | 265  | 68.25%     | 57.55%       | -0.12<br>[-0.23 - -0.01];<br>p-value 0.037 | 272   | 71.20%     | 63.27%       | -0.08<br>[-0.19 - 0.03];<br>p-value 0.133  |

| Variables                                                                                                                               | MP  |            |              |                                           | Bihar |            |              |                                          |
|-----------------------------------------------------------------------------------------------------------------------------------------|-----|------------|--------------|-------------------------------------------|-------|------------|--------------|------------------------------------------|
|                                                                                                                                         | N   | Comparison | Intervention | Difference                                | N     | Comparison | Intervention | Difference                               |
| % of mothers (6-12m child) who recalled being counselled about dietary diversity and adequate frequency of meals for their child by CHW | 470 | 17.70%     | 17.21%       | -0.01<br>[-0.08 - 0.06];<br>p-value 0.828 | 454   | 3.45%      | 7.66%        | 0.04<br>[0 - 0.08];<br>p-value 0.064     |
| % of children aged 6-12m who received adequate diet as per their age during previous 24 hours                                           | 470 | 7.96%      | 10.66%       | 0.03<br>[-0.03 - 0.08];<br>p-value 0.331  | 454   | 4.31%      | 6.76%        | 0.02<br>[-0.02 - 0.07];<br>p-value 0.269 |

**Table S3. Respondent, Household and CHW Characteristics at Endline, 2019.**

| Variables                                                          | MP   |            |              |                                           | Bihar |            |              |                                            |
|--------------------------------------------------------------------|------|------------|--------------|-------------------------------------------|-------|------------|--------------|--------------------------------------------|
|                                                                    | N    | Comparison | Intervention | Difference                                | N     | Comparison | Intervention | Difference                                 |
| <b>Individual and Household Characteristics</b>                    |      |            |              |                                           |       |            |              |                                            |
| Beneficiary's age (in completed years)                             | 4266 | 24.03      | 23.88        | -0.15<br>[-0.4 - 0.11];<br>p-value 0.249  | 4767  | 24.28      | 24.69        | 0.42<br>[0.14 - 0.69];<br>p-value 0.003    |
| Beneficiary's education (in years)                                 | 4266 | 5.32       | 5.49         | 0.11<br>[-0.21 - 0.43];<br>p-value 0.5    | 4731  | 4.48       | 4.03         | -0.45<br>[-0.84 - -0.05];<br>p-value 0.027 |
| Beneficiary completed at least 8 years of education                | 4266 | 44.24%     | 44.54%       | 0<br>[-0.04 - 0.03];<br>p-value 0.873     | 4767  | 35.15%     | 29.92%       | -0.05<br>[-0.09 - -0.02];<br>p-value 0.005 |
| Beneficiary works to earn income                                   | 4266 | 25.73%     | 25.35%       | 0<br>[-0.04 - 0.04];<br>p-value 0.982     | 4767  | 8.81%      | 11.12%       | 0.03<br>[0.01 - 0.05];<br>p-value 0.013    |
| Beneficiary was married before 18 years of age                     | 4266 | 21.13%     | 29.84%       | 0.09<br>[0.06 - 0.12];<br>p-value 0       | 4767  | 46.39%     | 49.52%       | 0.03<br>[0 - 0.06];<br>p-value 0.048       |
| Mother spent substantial portion of pregnancy in her maternal home | 3218 | 27.64%     | 33.47%       | 0.06<br>[0.02 - 0.1];<br>p-value 0.007    | 3417  | 41.86%     | 40.49%       | -0.01<br>[-0.05 - 0.03];<br>p-value 0.553  |
| Beneficiary finds it easy to reach the Anganwadi Center (AWC)      | 4266 | 83.08%     | 81.65%       | -0.01<br>[-0.05 - 0.02];<br>p-value 0.395 | 4767  | 76.43%     | 79.06%       | 0.03<br>[-0.01 - 0.06];<br>p-value 0.131   |
| Beneficiary owns an Aadhar card                                    | 4266 | 97.82%     | 97.28%       | -0.01<br>[-0.02 - 0];<br>p-value 0.244    | 4767  | 96.60%     | 96.39%       | 0<br>[-0.01 - 0.01];<br>p-value 0.67       |
| Beneficiary owns a bank account                                    | 4266 | 90.85%     | 90.07%       | -0.01<br>[-0.03 - 0.01];<br>p-value 0.334 | 4767  | 84.14%     | 86.99%       | 0.03<br>[0 - 0.05];<br>p-value 0.03        |
| Beneficiary ever used any family planning methods                  | 4266 | 34.93%     | 31.76%       | -0.03<br>[-0.07 - 0];<br>p-value 0.051    | 4767  | 14.60%     | 19.35%       | 0.05<br>[0.03 - 0.08];<br>p-value 0        |
| Total number of pregnancies in beneficiary's lifetime              | 4266 | 2.39       | 2.32         | -0.06<br>[-0.16 - 0.03];<br>p-value 0.164 | 4767  | 2.70       | 2.92         | 0.21<br>[0.11 - 0.32];<br>p-value 0        |
| Mother had a normal delivery                                       | 3218 | 91.59%     | 91.87%       | 0<br>[-0.02 - 0.02];<br>p-value 0.691     | 3417  | 88.50%     | 91.73%       | 0.03<br>[0.01 - 0.05];<br>p-value 0.004    |
| Child was born on time                                             | 3218 | 95.60%     | 94.62%       | -0.01<br>[-0.03 - 0.01];<br>p-value 0.35  | 3417  | 92.47%     | 88.50%       | -0.04<br>[-0.06 - -0.01];<br>p-value 0.002 |
| Beneficiary belongs to Scheduled caste/tribe household             | 4266 | 55.91%     | 51.09%       | -0.04<br>[-0.09 - 0];<br>p-value 0.055    | 4767  | 35.95%     | 36.59%       | 0.01<br>[-0.04 - 0.06];<br>p-value 0.752   |



| Variables                                                                                                                             | MP   |            |              |                                           | Bihar |            |              |                                            |
|---------------------------------------------------------------------------------------------------------------------------------------|------|------------|--------------|-------------------------------------------|-------|------------|--------------|--------------------------------------------|
|                                                                                                                                       | N    | Comparison | Intervention | Difference                                | N     | Comparison | Intervention | Difference                                 |
| Beneficiary belongs to Below-Poverty-Line household                                                                                   | 4266 | 70.11%     | 68.46%       | -0.01<br>[-0.05 - 0.02];<br>p-value 0.384 | 4767  | 60.11%     | 59.13%       | -0.01<br>[-0.05 - 0.02];<br>p-value 0.416  |
| Beneficiary lives in a pucca house                                                                                                    | 4266 | 33.20%     | 38.04%       | 0.05<br>[0.01 - 0.08];<br>p-value 0.012   | 4767  | 52.68%     | 46.45%       | -0.05<br>[-0.09 - -0.02];<br>p-value 0.006 |
| Number of rooms used for sleeping in beneficiary's household                                                                          | 4266 | 2.08       | 2.11         | 0.03<br>[-0.06 - 0.11];<br>p-value 0.511  | 4767  | 2.21       | 2.12         | -0.08<br>[-0.17 - 0.01];<br>p-value 0.073  |
| Beneficiary's household owns any agricultural land                                                                                    | 4266 | 74.02%     | 70.69%       | -0.03<br>[-0.07 - 0.01];<br>p-value 0.178 | 4767  | 42.83%     | 40.54%       | -0.02<br>[-0.06 - 0.02];<br>p-value 0.376  |
| Beneficiary's household uses improved fuel for cooking                                                                                | 4266 | 15.34%     | 16.17%       | 0.01<br>[-0.02 - 0.04];<br>p-value 0.569  | 4767  | 23.41%     | 24.09%       | 0.01<br>[-0.03 - 0.04];<br>p-value 0.691   |
| Beneficiary's household gets drinking water from improved source                                                                      | 4266 | 24.99%     | 26.10%       | 0.01<br>[-0.02 - 0.04];<br>p-value 0.525  | 4767  | 70.30%     | 66.39%       | -0.05<br>[-0.08 - -0.01];<br>p-value 0.016 |
| Beneficiary's household has a functional toilet                                                                                       | 4266 | 73.82%     | 61.87%       | -0.12<br>[-0.16 - -0.07];<br>p-value 0    | 4767  | 36.91%     | 47.88%       | 0.11<br>[0.06 - 0.15];<br>p-value 0        |
| Household Wealth Index based on Principle Component Analysis                                                                          | 4266 | 0.45       | 0.37         | -0.08<br>[-0.29 - 0.12];<br>p-value 0.426 | 4767  | -0.30      | -0.43        | -0.14<br>[-0.28 - 0.01];<br>p-value 0.063  |
| <b>Health services to mothers</b>                                                                                                     |      |            |              |                                           |       |            |              |                                            |
| Beneficiary registered pregnancy with the AWC                                                                                         | 4266 | 81.59%     | 80.09%       | -0.01<br>[-0.04 - 0.02];<br>p-value 0.409 | 4767  | 72.48%     | 74.11%       | 0.01<br>[-0.02 - 0.05];<br>p-value 0.377   |
| Beneficiary attended a Village Health and Nutrition Day in last three months (or since birth)                                         | 4266 | 49.98%     | 56.44%       | 0.06<br>[0.02 - 0.1];<br>p-value 0.004    | 4767  | 22.44%     | 25.18%       | 0.03<br>[-0.01 - 0.06];<br>p-value 0.125   |
| Mother received at least 4 Antenatal check-ups from a health professional/worker                                                      | 3218 | 61.04%     | 57.56%       | -0.04<br>[-0.08 - 0];<br>p-value 0.076    | 3417  | 23.64%     | 15.32%       | -0.08<br>[-0.11 - -0.05];<br>p-value 0     |
| Mother had institutional delivery                                                                                                     | 3218 | 85.50%     | 85.95%       | 0<br>[-0.03 - 0.04];<br>p-value 0.919     | 3417  | 78.05%     | 69.48%       | -0.08<br>[-0.13 - -0.04];<br>p-value 0     |
| Number of visits to mother in last three months by volunteer (called ASHA) of another government programme under rural health mission | 3218 | 1.74       | 1.97         | 0.22<br>[0.05 - 0.38];<br>p-value 0.01    | 3417  | 1.29       | 1.24         | -0.05<br>[-0.2 - 0.1];<br>p-value 0.477    |
| <b>Community Health Worker (CHW) Characteristics</b>                                                                                  |      |            |              |                                           |       |            |              |                                            |
| CHW's age                                                                                                                             | 684  | 38.06      | 39.66        | 1.5<br>[0.13 - 2.86];<br>p-value 0.032    | 633   | 39.33      | 37.67        | -1.64<br>[-2.92 - -0.37];<br>p-value 0.012 |

| Variables                                                                  | MP  |            |              |                                           | Bihar |            |              |                                           |
|----------------------------------------------------------------------------|-----|------------|--------------|-------------------------------------------|-------|------------|--------------|-------------------------------------------|
|                                                                            | N   | Comparison | Intervention | Difference                                | N     | Comparison | Intervention | Difference                                |
| CHW's education (in years)                                                 | 684 | 10.64      | 10.93        | 0.14<br>[-0.41 - 0.69];<br>p-value 0.623  | 633   | 11.50      | 11.80        | 0.3<br>[-0.03 - 0.64];<br>p-value 0.078   |
| CHW completed at least 12 years of education                               | 684 | 48.44%     | 54.68%       | 0.05<br>[-0.03 - 0.13];<br>p-value 0.215  | 633   | 55.10%     | 57.52%       | 0.02<br>[-0.06 - 0.1];<br>p-value 0.572   |
| CHW belongs to scheduled caste/tribe household                             | 684 | 58.64%     | 47.73%       | -0.05<br>[-0.11 - 0.01];<br>p-value 0.091 | 633   | 14.97%     | 20.06%       | 0.05<br>[0 - 0.11];<br>p-value 0.073      |
| CHW owns a smartphone                                                      | 684 | 32.58%     | 100.00%      | 0.67<br>[0.62 - 0.72];<br>p-value 0       | 633   | 59.18%     | 94.69%       | 0.35<br>[0.28 - 0.42];<br>p-value 0       |
| Number of years of experience as an CHW                                    | 684 | 14.31      | 15.73        | 1.42<br>[0.18 - 2.66];<br>p-value 0.025   | 633   | 15.59      | 12.17        | -3.37<br>[-4.51 - -2.23];<br>p-value 0    |
| CHW is engaged in other work to earn income                                | 684 | 5.38%      | 6.04%        | 0<br>[-0.04 - 0.04];<br>p-value 0.916     | 633   | 7.48%      | 8.55%        | 0.01<br>[-0.04 - 0.05];<br>p-value 0.759  |
| Number of months in the last year for which the CHW did not receive salary | 684 | 1.42       | 0.98         | -0.45<br>[-0.79 - -0.1];<br>p-value 0.012 | 633   | 5.30       | 4.53         | -0.81<br>[-1.24 - -0.39];<br>p-value 0    |
| CHW is trained in 7 key topics under the systems strengthening programme   | 684 | 75.35%     | 74.62%       | -0.04<br>[-0.1 - 0.02];<br>p-value 0.218  | 633   | 53.06%     | 51.92%       | -0.01<br>[-0.09 - 0.07];<br>p-value 0.851 |
| AWC has pucca construction                                                 | 684 | 80.45%     | 90.63%       | 0.09<br>[0.04 - 0.15];<br>p-value 0.001   | 633   | 58.16%     | 49.85%       | -0.07<br>[-0.14 - 0];<br>p-value 0.041    |
| AWC has drinking water on premises                                         | 681 | 65.91%     | 67.78%       | 0.01<br>[-0.06 - 0.08];<br>p-value 0.769  | 611   | 49.31%     | 49.54%       | 0<br>[-0.09 - 0.08];<br>p-value 0.917     |
| AWC has toilet on premises                                                 | 681 | 52.84%     | 48.63%       | -0.06<br>[-0.14 - 0.01];<br>p-value 0.096 | 611   | 18.40%     | 24.15%       | 0.05<br>[-0.01 - 0.12];<br>p-value 0.107  |
| AWC has drinking water and toilet on premises                              | 684 | 40.23%     | 38.67%       | -0.03<br>[-0.11 - 0.04];<br>p-value 0.408 | 633   | 14.97%     | 17.70%       | 0.02<br>[-0.04 - 0.08];<br>p-value 0.46   |
| AWC has electricity supply                                                 | 684 | 32.58%     | 19.05%       | -0.14<br>[-0.2 - -0.07];<br>p-value 0     | 633   | 25.51%     | 27.26%       | 0.01<br>[-0.06 - 0.09];<br>p-value 0.72   |
| AWC has functional child weighing scale                                    | 684 | 84.42%     | 83.38%       | -0.02<br>[-0.09 - 0.04];<br>p-value 0.459 | 633   | 75.85%     | 83.48%       | 0.07<br>[0.01 - 0.14];<br>p-value 0.033   |
| AWC has growth charts for children                                         | 684 | 45.61%     | 50.15%       | 0.02<br>[-0.06 - 0.1];<br>p-value 0.668   | 633   | 38.44%     | 35.40%       | -0.03<br>[-0.11 - 0.05];<br>p-value 0.464 |

| Variables                                                                              | MP  |            |              |                                            | Bihar |            |              |                                              |
|----------------------------------------------------------------------------------------|-----|------------|--------------|--------------------------------------------|-------|------------|--------------|----------------------------------------------|
|                                                                                        | N   | Comparison | Intervention | Difference                                 | N     | Comparison | Intervention | Difference                                   |
| AWC has child weighing scale and growth charts for children                            | 684 | 43.06%     | 47.73%       | 0.02<br>[-0.06 - 0.1];<br>p-value 0.623    | 633   | 34.01%     | 33.92%       | 0<br>[-0.08 - 0.08];<br>p-value 0.975        |
| CHW reported facing problems with Take-Home-Ration supply from district administration | 684 | 12.46%     | 7.25%        | -0.06<br>[-0.11 - -0.01];<br>p-value 0.012 | 633   | 35.71%     | 53.39%       | 0.17<br>[0.09 - 0.26];<br>p-value 0          |
| Total population in AWC catchment area                                                 | 613 | 698.11     | 829.11       | 117.92<br>[65.67 - 170.17];<br>p-value 0   | 534   | 1081.78    | 1023.97      | -57.95<br>[-102.5 - -13.4];<br>p-value 0.011 |
| Total population covered by AWC >= 800                                                 | 613 | 37.74%     | 51.16%       | 0.11<br>[0.03 - 0.2];<br>p-value 0.009     | 534   | 91.44%     | 86.86%       | -0.05<br>[-0.1 - 0.01];<br>p-value 0.097     |
| Number of pregnant women in AWC catchment area                                         | 612 | 5.83       | 7.72         | 1.91<br>[1.21 - 2.62];<br>p-value 0        | 544   | 12.15      | 11.48        | -0.68<br>[-1.36 - 0];<br>p-value 0.051       |
| Number of lactating women in AWC catchment area                                        | 612 | 6.92       | 8.60         | 1.67<br>[0.89 - 2.46];<br>p-value 0        | 543   | 12.57      | 9.88         | -2.67<br>[-3.39 - -1.95];<br>p-value 0       |
| CHW has frequent interactions with her immediate supervisor                            | 684 | 49.86%     | 53.47%       | 0.05<br>[-0.03 - 0.13];<br>p-value 0.233   | 633   | 60.54%     | 54.57%       | -0.06<br>[-0.15 - 0.02];<br>p-value 0.156    |
